# Supplementary material
Source: MDPI journal article supplement (https://www.mdpi.com/2079-6412/11/5/582)
Supplement: s1 [file s1]

## Supplementary Materials

# Guiding Stem Cell Differentiation and Proliferation Activities Based on Nanometer-Thick Functionalized Poly-*p*-xylylene Coatings

Chih-Yu Wu <sup>1,2,3,†</sup>, Yu-Chih Chiang <sup>3,4,†</sup>, Jane Christy <sup>1</sup>, Abel Po-Hao Huang <sup>4,5</sup>, Nai-Yun Chang <sup>1</sup>, Wenny <sup>1</sup>, Yu-Chih Chiu <sup>6</sup>, Yen-Ching Yang <sup>1</sup>, Po-Chun Chen <sup>6,\*</sup>, Peng-Yuan Wang <sup>7,8,\*</sup> and Hsien-Yeh Chen <sup>1,2,3,\*</sup>

<sup>1</sup> Department of Chemical Engineering, National Taiwan University, Taipei 10617, Taiwan; picorna.tw@yahoo.com.tw (C.-Y.W.); b07504085@ntu.edu.tw (J.C.); Changnaiyun@ntu.edu.tw (N.-Y.C.); r06524094@ntu.edu.tw (W.); youngeddie@cgmh.org.tw (Y.-C.Y.)

<sup>2</sup> Advanced Research Center for Green Materials Science and Technology, National Taiwan University, Taipei 10617, Taiwan

<sup>3</sup> Molecular Imaging Center, National Taiwan University, Taipei 10617, Taiwan; munichiang@ntu.edu.tw

<sup>4</sup> School of Dentistry, Graduate Institute of Clinical Dentistry, National Taiwan University, Taipei 10048, Taiwan; howhuang6138@ntu.edu.tw

<sup>5</sup> Division of Neurosurgery, Department of Surgery, National Taiwan University Hospital, Taipei 10048, Taiwan

<sup>6</sup> Department of Materials and Mineral Resources Engineering, National Taipei University of Technology, Taipei 10608, Taiwan; t107788007@ntut.edu.tw

<sup>7</sup> Center for Human Tissues and Organs Degeneration, Institute of Biomedicine and Biotechnology, Shenzhen Institutes of Advanced Technology, Chinese Academy of Sciences, Shenzhen 518055, China

<sup>8</sup> Department of Chemistry and Biotechnology, Swinburne University of Technology, Victoria 3122, Australia

\* Correspondence: cpc@mail.ntut.edu.tw (P.-C.C.); py.wang@siat.ac.cn (P.-Y.W.); hsychen@ntu.edu.tw (H.-Y.C.); Tel. +886-2-33669476 (H.-Y.C.); Fax: +886-2-23623040 (H.-Y.C.)

† Chih-Yu Wu and Yu-Chih Chiang contributed equally to this work.

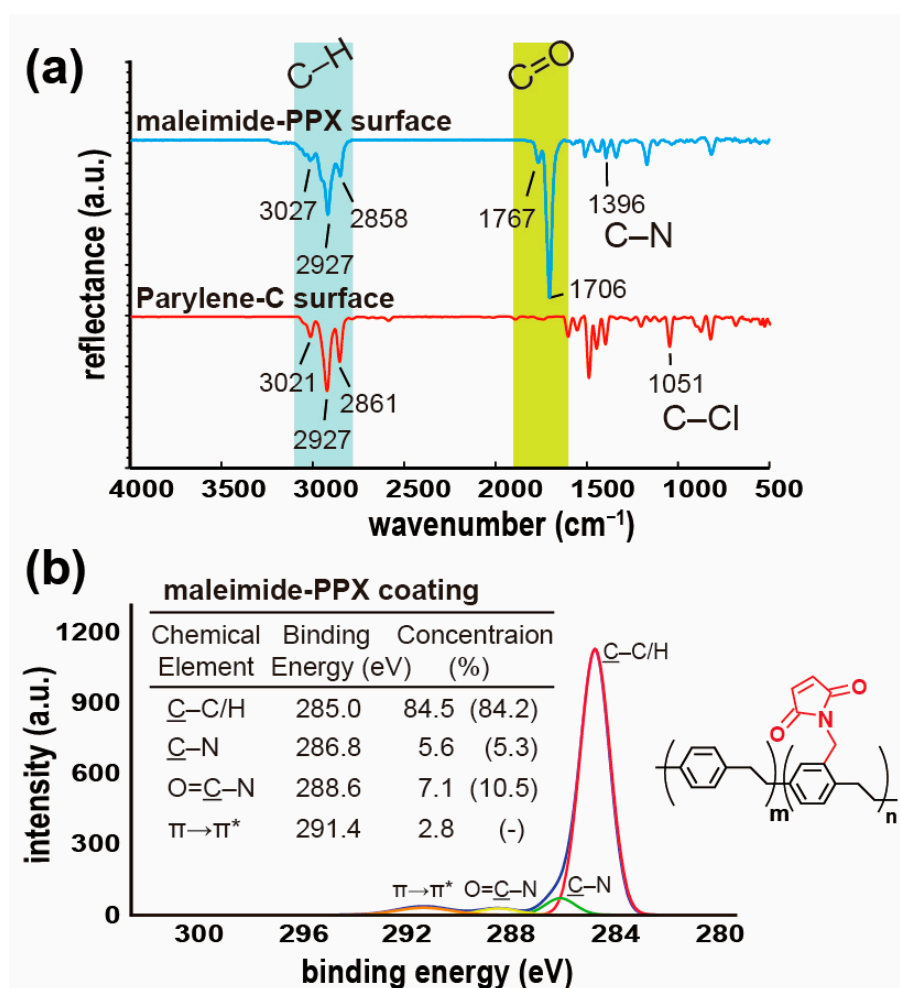

**Figure S1.** Maleimide-functionalized poly-p-xylylene (maleimide-PPX) coating. **(a)** Infrared reflection-absorption spectroscopy (IRRAS) spectra for the maleimide-PPX coating. The peaks located at  $1396\text{ cm}^{-1}$  (C-N),  $1706$  and  $1767\text{ cm}^{-1}$  (C=O) correspond to the characteristic band stretches for the maleimide groups. Infrared reflection absorption spectroscopy (IRRAS) spectra for the Parylene-C coating which has no maleimide was also shown for the better comparison. **(b)** X-ray photoelectron spectroscopy (XPS) characterization of the maleimide-PPX coating. The table compares the experimental values of the XPS survey high-resolution C1 s spectra with the theoretical predictions. The signal at  $285.0\text{ eV}$  is attributed to the aliphatic and aromatic carbons (C-C, C-H), and the intensity at  $84.5\text{ at\%}$  compares well with the theoretical concentration of  $84.2\text{ at\%}$ . The C-N bond was detected with  $5.6\text{ at\%}$ , which compares well with the theoretical value of  $5.3\text{ at\%}$ . The peak at  $288.6\text{ eV}$  was assigned to the O=C-N group of the maleimide ( $7.1\text{ at\%}$ ) and agrees with the theoretical value of  $10.5\text{ at\%}$ . The signal at  $291.4\text{ eV}$  ( $2.8\text{ at\%}$ ) indicates  $\pi \rightarrow \pi^*$  transitions.

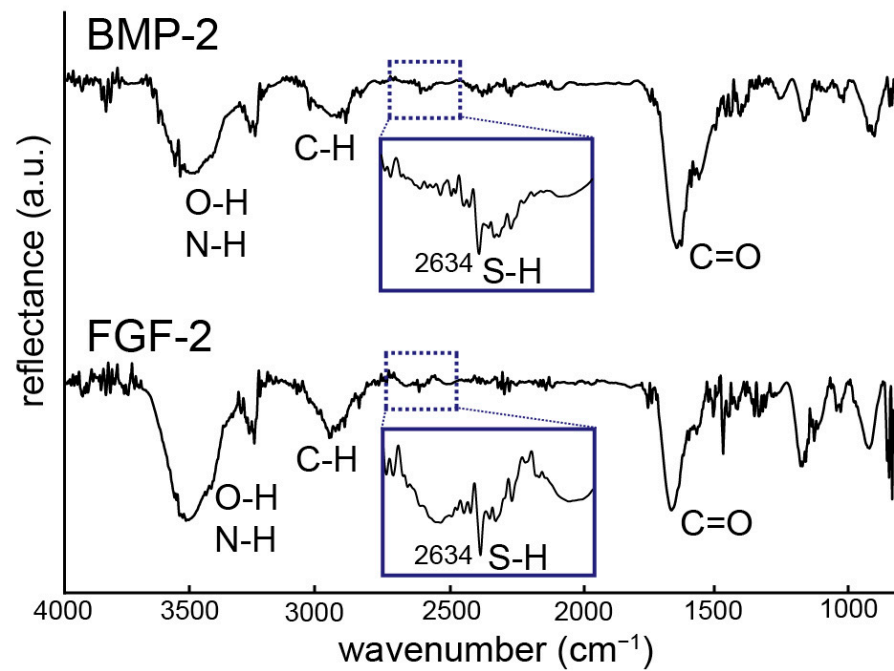

**Figure S2.** FT-IR spectra of BMP-2 (bone morphogenetic protein 2) and FGF-2 (fibroblast growth factor 2) alone. The thiol groups of the BMP-2 and FGF-2 proteins (i.e., S-H band at  $2634\text{ cm}^{-1}$ ) in the spectra were highlighted.

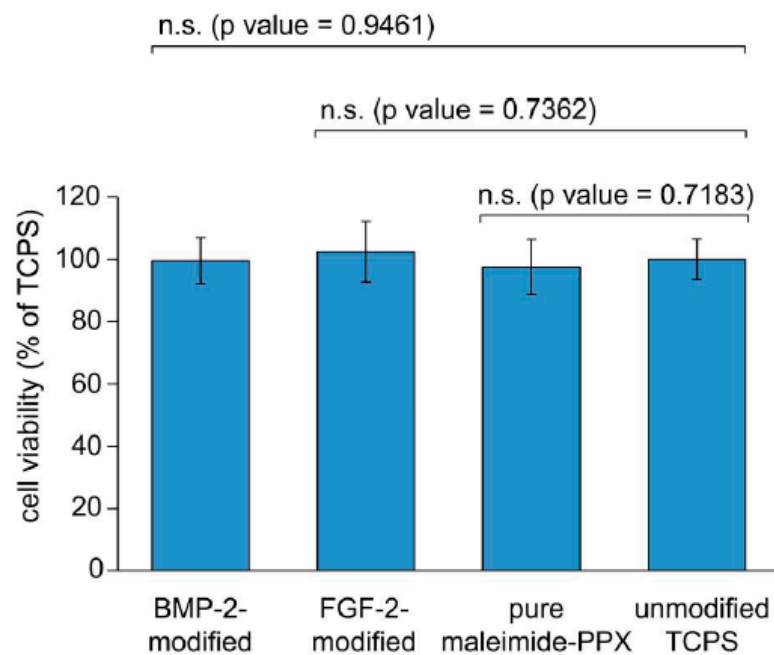

**Figure S3.** Biocompatibility analysis of the maleimide-PPX coatings. The human adipose-derived stem cells (hADSCs) were cultured on each surface for 1 day and the cell viabilities were then quantified by using a 3-(4,5-dimethylthiazol-2-yl)-2,5-diphenyltetrazolium bromide (MTT) assay. The data bars represent the mean value and the standard deviation ( $\pm$ SD) based on three independent samples. The p-value large than 0.05 indicates the studied surface has a good biocompatibility with no significant difference (n.s.) as compared to the unmodified TCPS surfaces.
